# Supplementary material for: Molecular Characteristics and Genetic Evolutionary Analyses of Circulating Parvoviruses Derived From Cats in Beijing
Source: Research Square preprint supplement (doi:10.21203/rs.3.rs-714489/v1), 2021-07-21
Supplement: Supplementary file 1 [file 47403b56721a497b32055f57.xlsx]

## Sheet: Sheet1
Table 1 Sequence, polarity, position and product length of PCR primers used for amplification of the full-length VP2 gene of Feline parvovirus (FPV) and Canine parvovirus (CPV)
Primer	Sequence 5’ to 3’	Positiona	Length (bp)a
F1F	CCACCTCATATTTTCATCAA	2709-2728	1325
F1R	TGAATCCAATCTCCTTCTG	4015-4033
F2F	GATGAAAATCAAGCAGCAG	3885-3903	817
F2R	CCTTCTAAATCCTATATCAAATAC	4678-4701
aThe size and nucleotide position of the PCR products, according to the genomic sequence of CPV-2 (GenBank accession no. M38245)
